# Supplementary material
Source: PubMed Central journal article supplement (PMC2827964)
Supplement: JCI41443sd.pdf [file JCI41443sd.pdf]

## Supplemental Figure 1

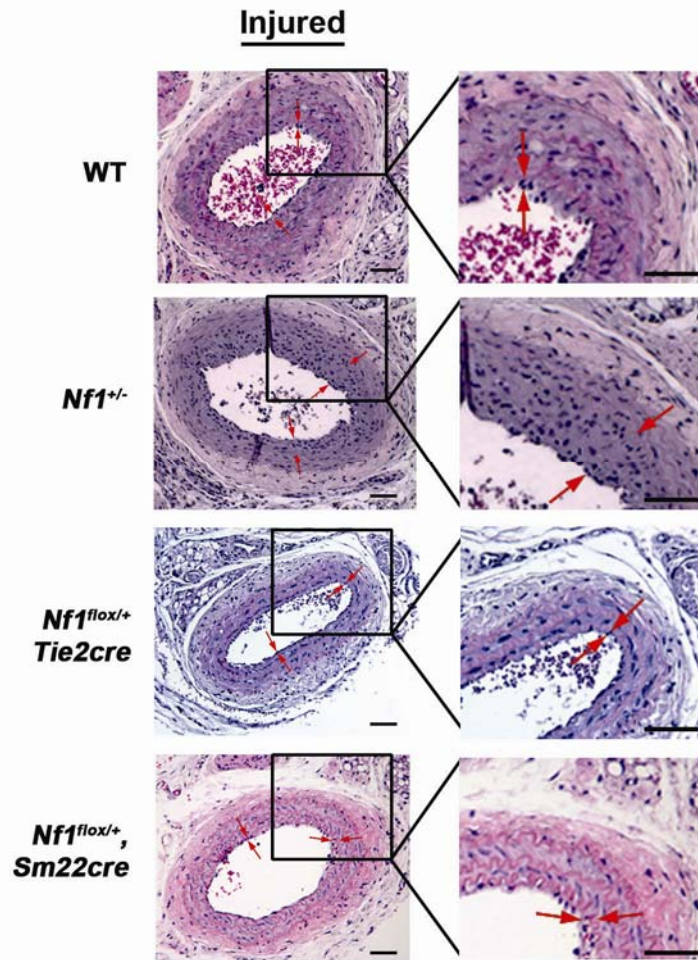

**Supplemental Figure 1. Histological analysis of neointima formation in WT, *Nf1*<sup>+/-</sup>, *Nf1*<sup>lox/+</sup>; *Tie2cre* and *Nf1*<sup>lox/+</sup>; *SM22cre* mice.** Representative H&E stained arterial cross-sections from injured WT, *Nf1*<sup>+/-</sup>, *Nf1*<sup>lox/+</sup>; *Tie2cre* and *Nf1*<sup>lox/+</sup>; *SM22cre* mice. Black boxes identify area magnified in right panel. **Scale bars represent 50 μm.**

Supplemental Figure 2

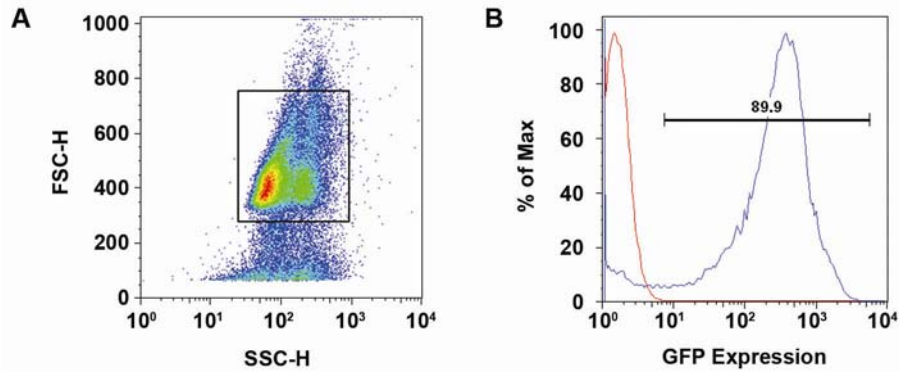

**Supplemental Figure 2. Determination of bone marrow engraftment.** **A)** Representative forward-scatter (FSC-H) side-scatter (SSC-H) profile of whole MNCs from murine peripheral blood. Black box represents live events gated for GFP expression analysis. **B)** Representative histogram of percent GFP expression in MNCs harvested from *Nf1*<sup>+/-</sup> mice reconstituted with WT-GFP bone marrow three months after transplantation. Similar results were obtained in WT mice transplanted with *Nf1*<sup>+/-</sup>-GFP bone marrow (data not shown). Red line represents GFP negative control. Blue line represents MNCs from a mouse transplanted with GFP positive bone marrow.

### Supplemental Figure 3

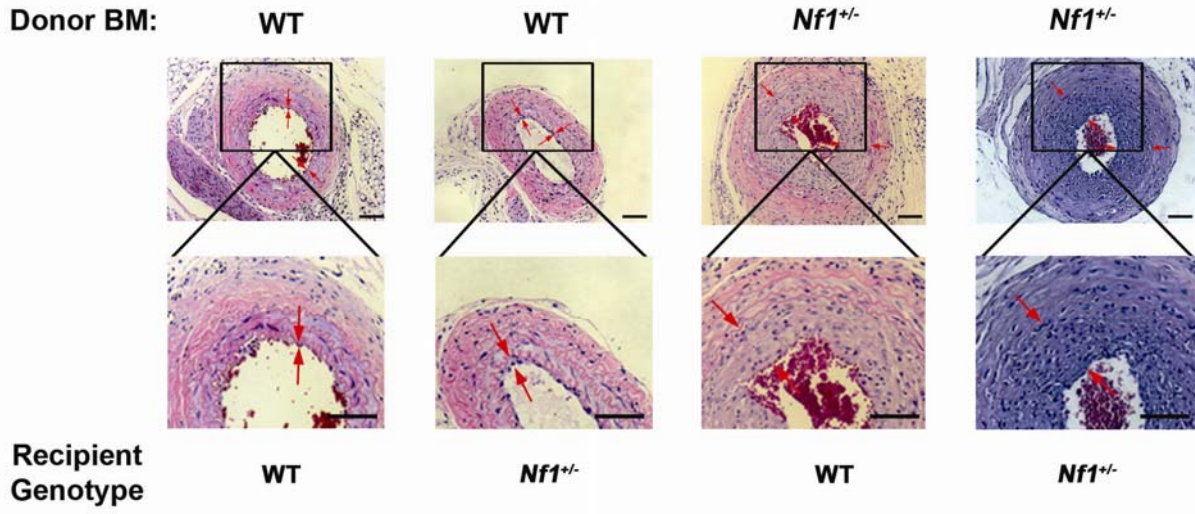

**Supplemental Figure 3. Histological analysis of WT and *Nf1*<sup>+/-</sup> mice transplanted with WT and *Nf1*<sup>+/-</sup> bone marrow.** Representative H&E stained arterial cross-sections from injured WT and *Nf1*<sup>+/-</sup> mice transplanted with WT or *Nf1*<sup>+/-</sup> bone marrow (BM). Black boxes identify area magnified in lower panel. **Scale bars represent 50 μm.**
